# Supplementary material for: Impact of fatty liver on long-term outcomes in chronic hepatitis B: a systematic review and matched analysis of individual patient data meta-analysis
Source: PubMed Central journal article supplement — Clin Mol Hepatol. 2023 May 8;29(3):705–20. doi: 10.3350/cmh.2023.0004 (PMC10366810; doi:10.3350/cmh.2023.0004), 2023-05-08
Supplement: cmh-2023-0004-Supplementary-Fig-3.pdf [file cmh-2023-0004-Supplementary-Fig-3.pdf]

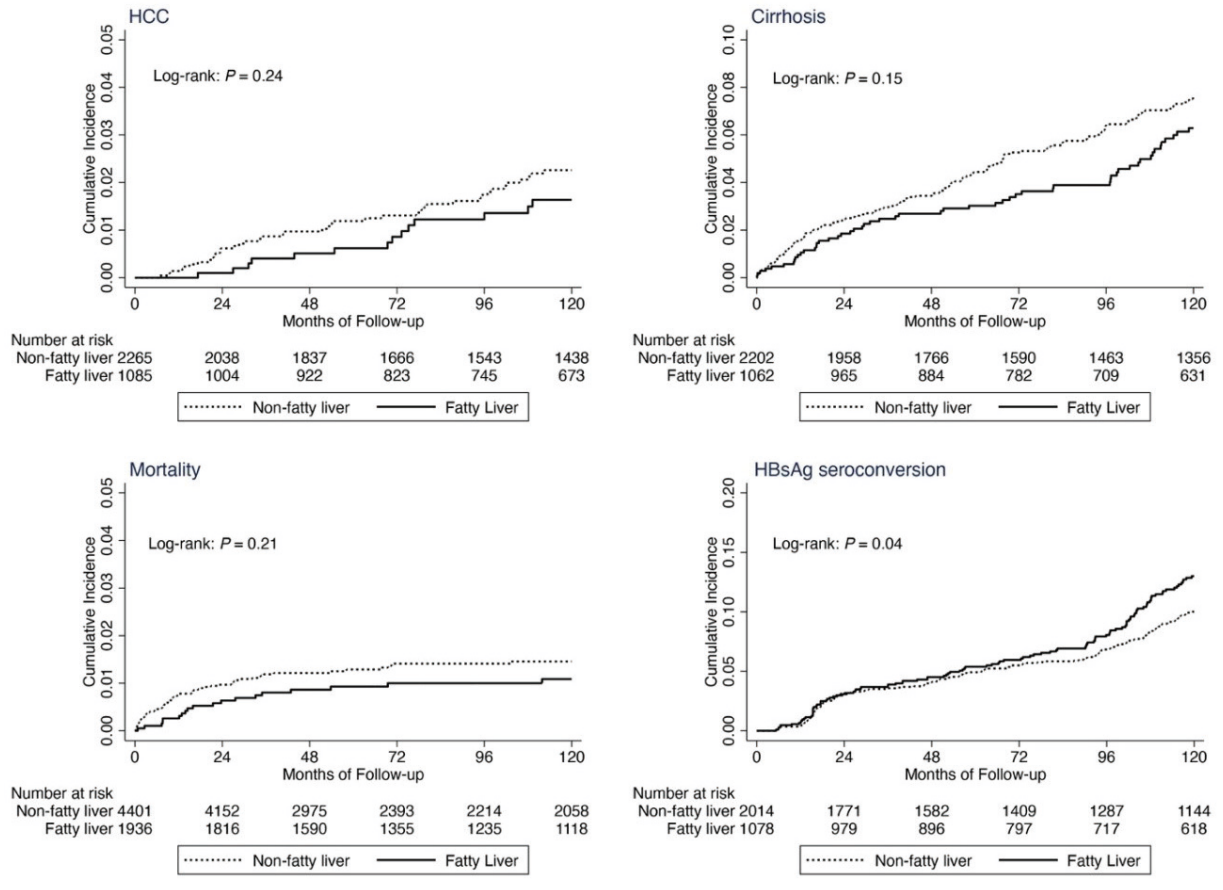

**A** Among patients aged 45 and younger

**Supplementary Figure 3.** Individual patient-level data meta-analysis: Subgroup analysis of cumulative incidence of clinical outcomes in the total cohort of patients with chronic hepatitis B with and without fatty liver based on: Age (A & B), Sex (C & D), Treatment status (E & F), Presence of Diabetes Mellitus (G & H), HBeAg seropositivity (I), Baseline liver cirrhosis (J & K) and Diagnosis method of fatty liver (L).

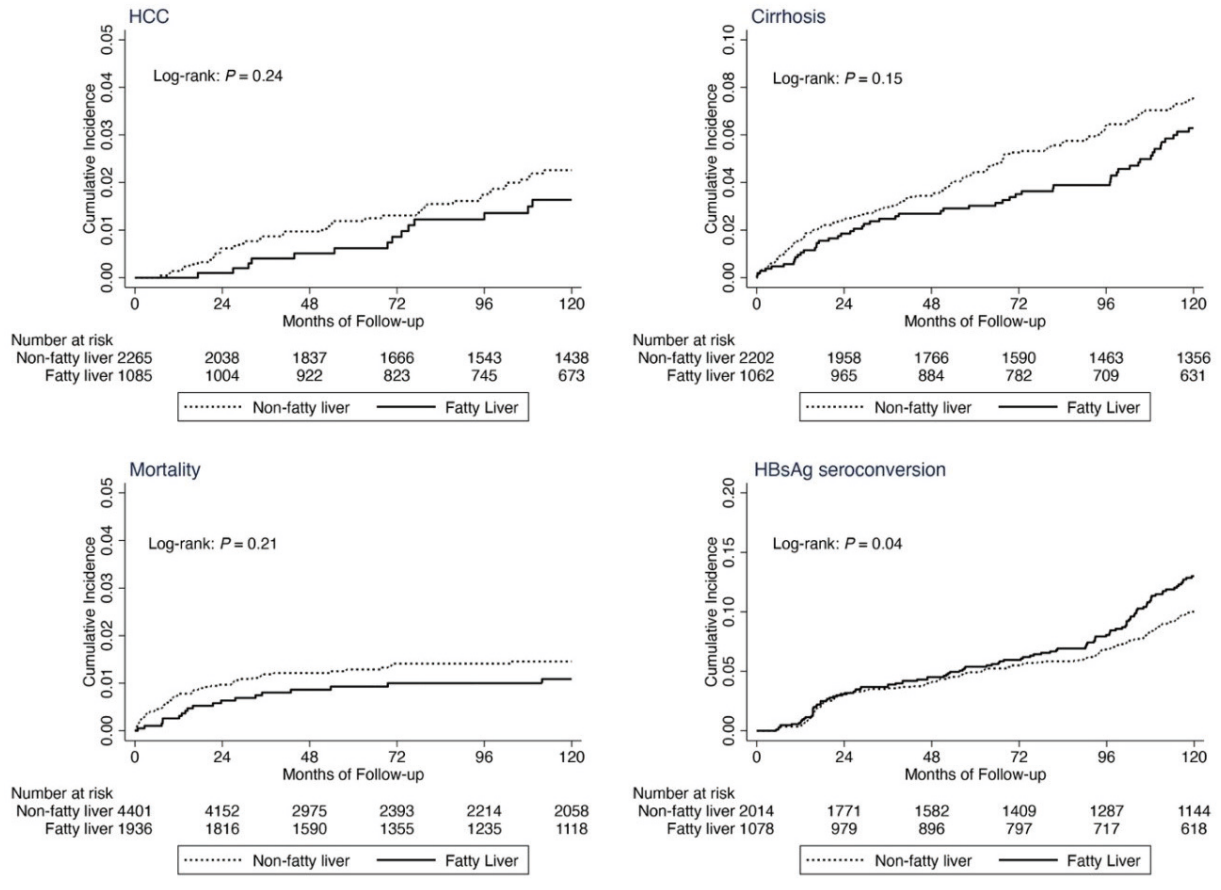

**B** Among patients older than 45  
**Supplementary Figure 3.** Continued.

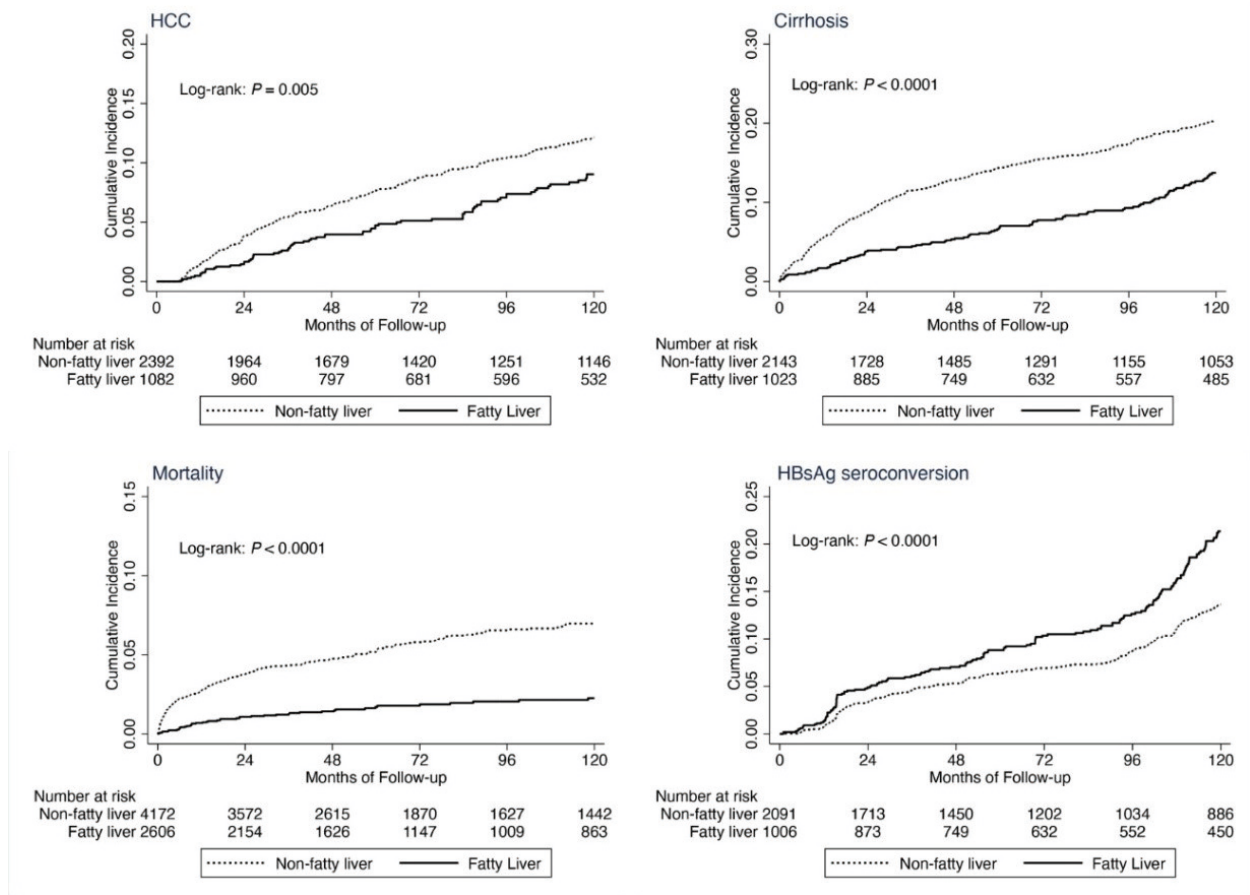

Among female patients

Supplementary Figure 3. Continued.

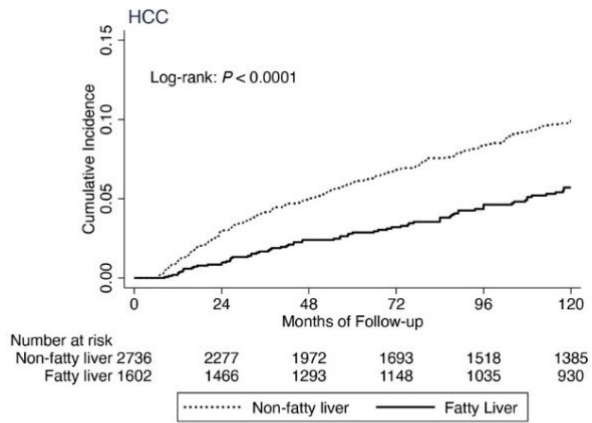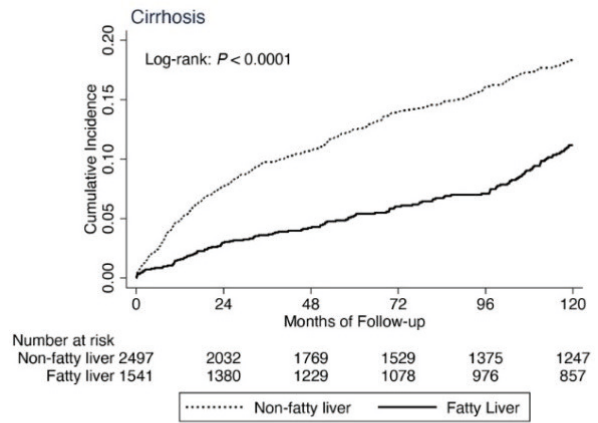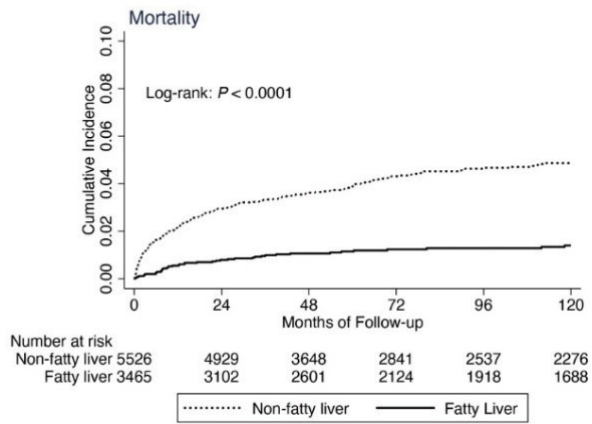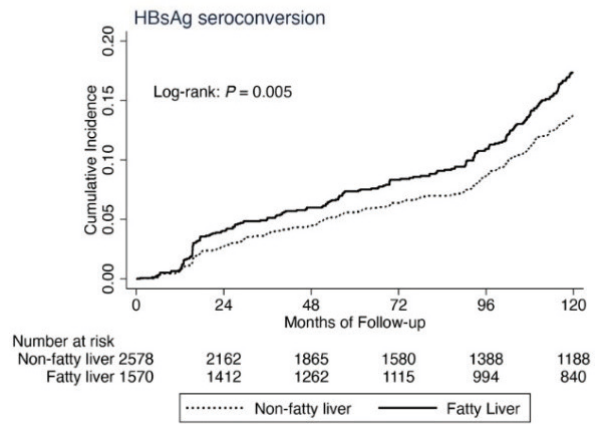

**D** Among male patients

Supplementary Figure 3. Continued.

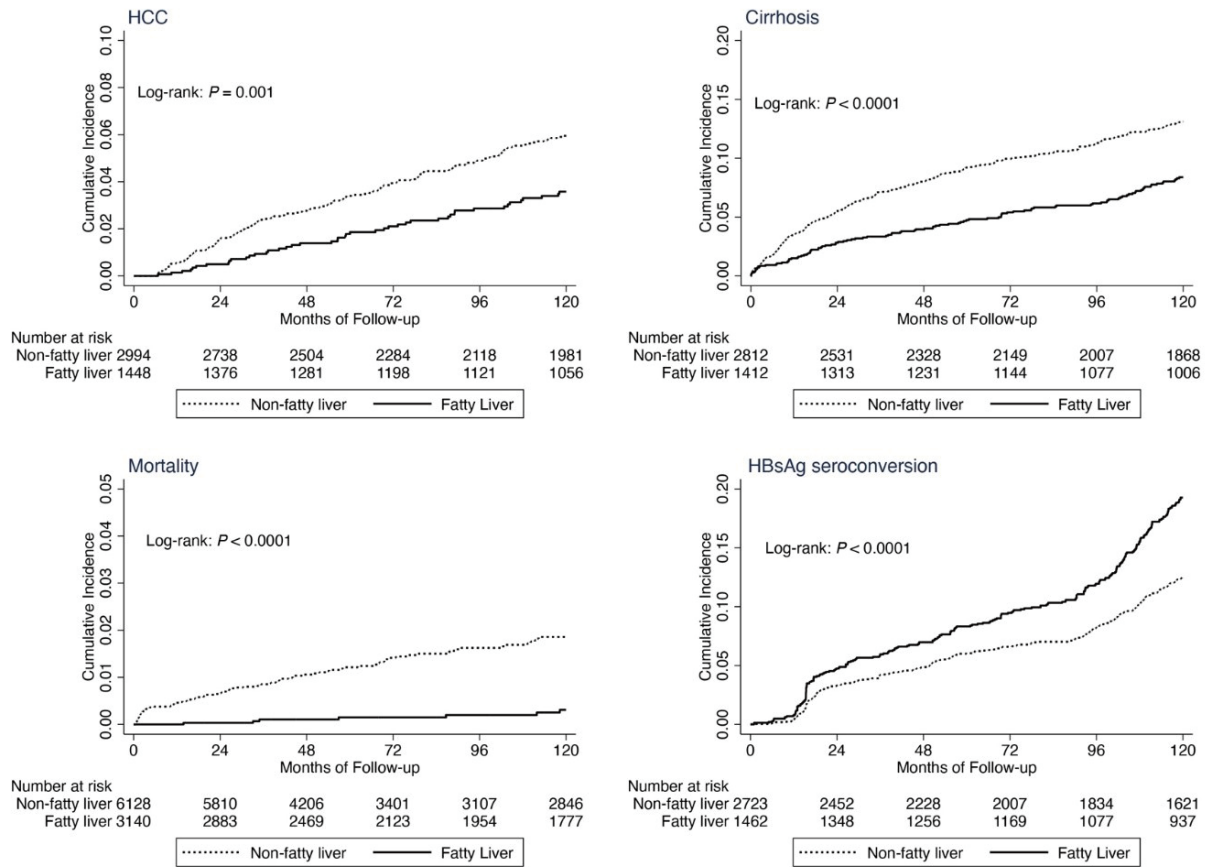

**E** Among untreated patients

**Supplementary Figure 3.** Continued.

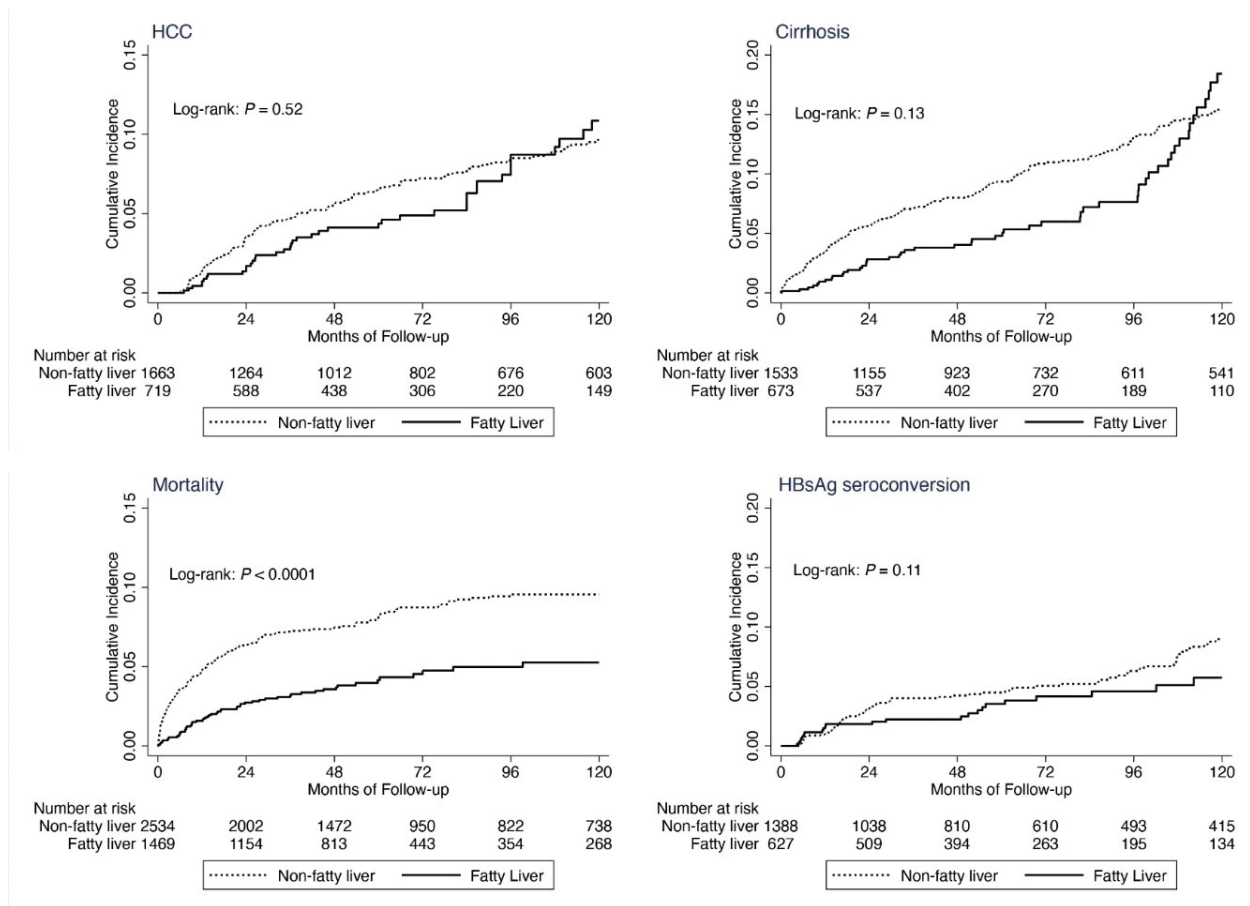

**F** Among treated patients

**Supplementary Figure 3.** Continued.

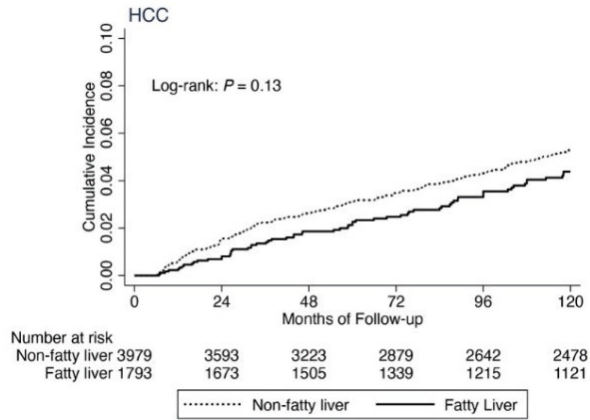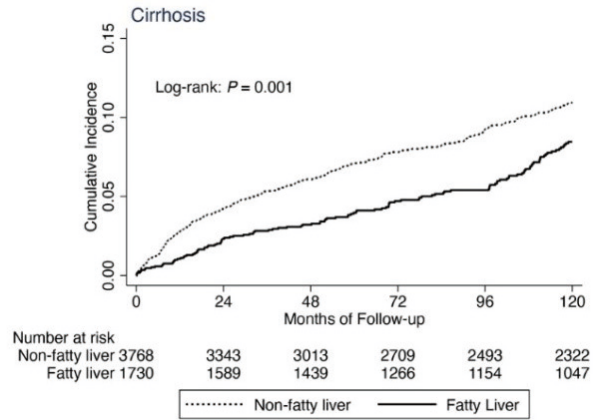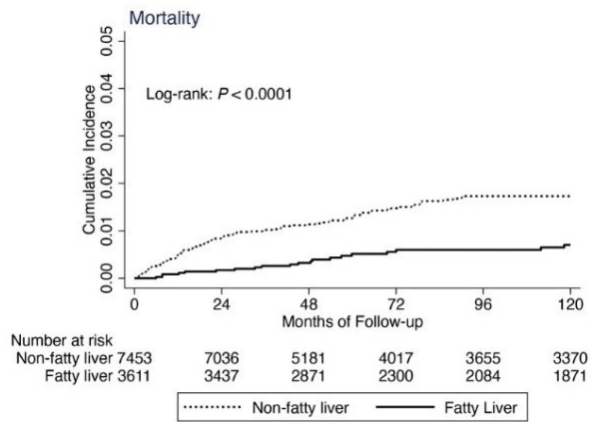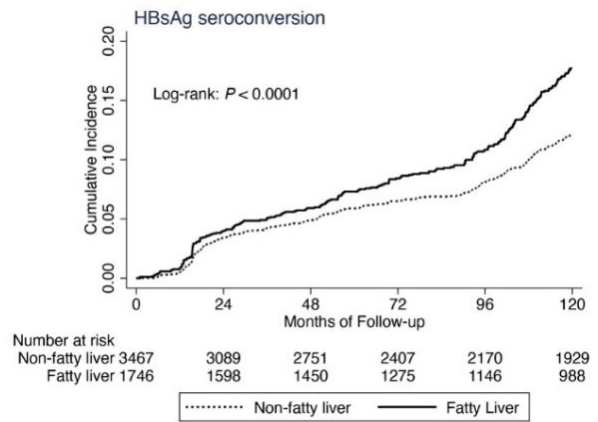

**G** Among non-diabetic patients  
**Supplementary Figure 3.** Continued.

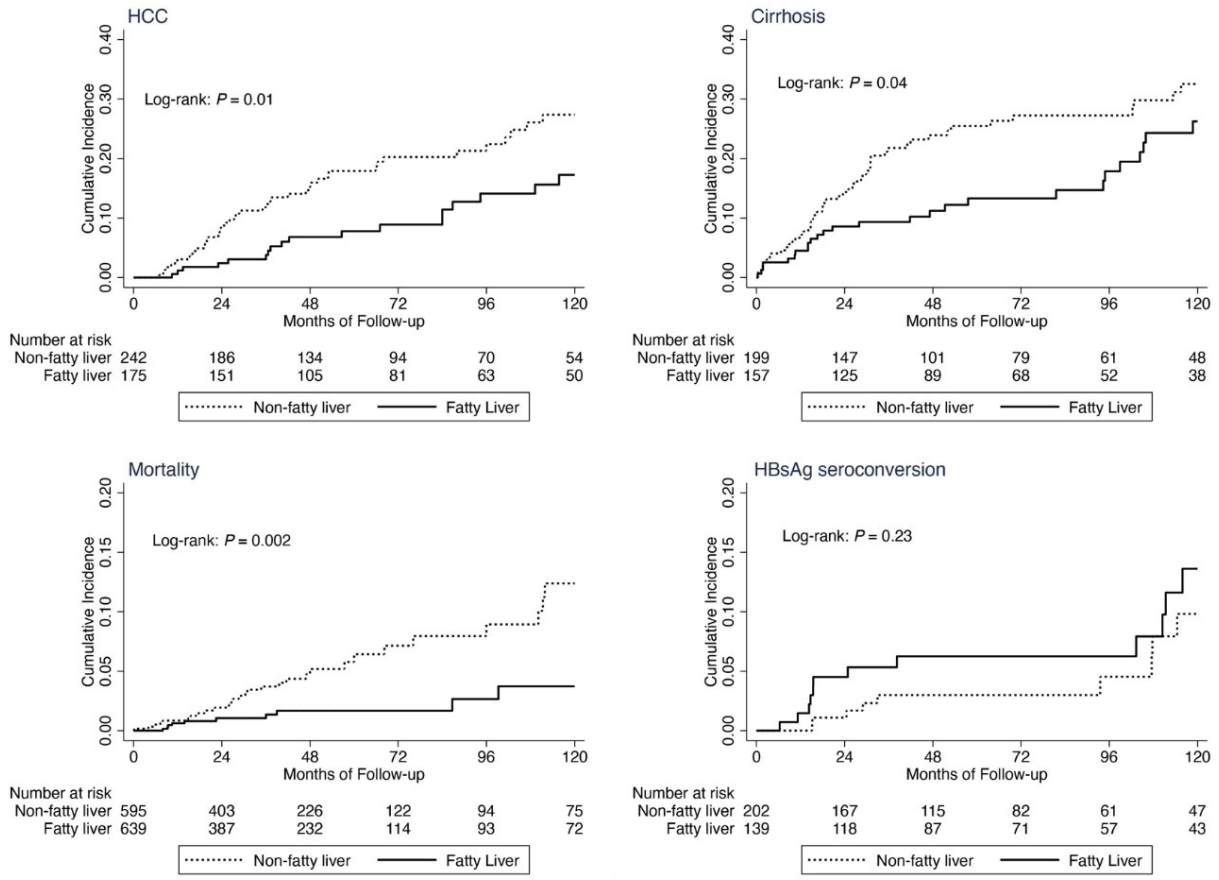

**H** Among diabetic patients

**Supplementary Figure 3.** Continued.



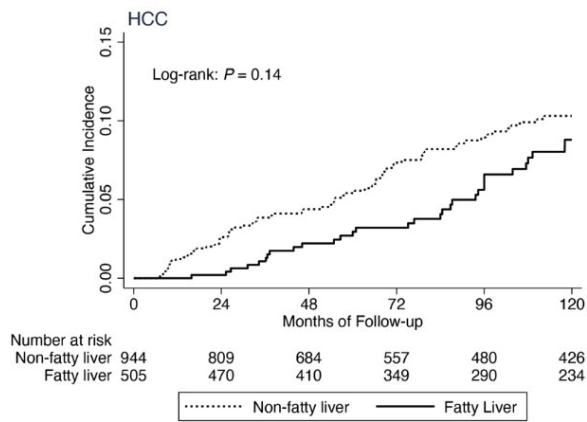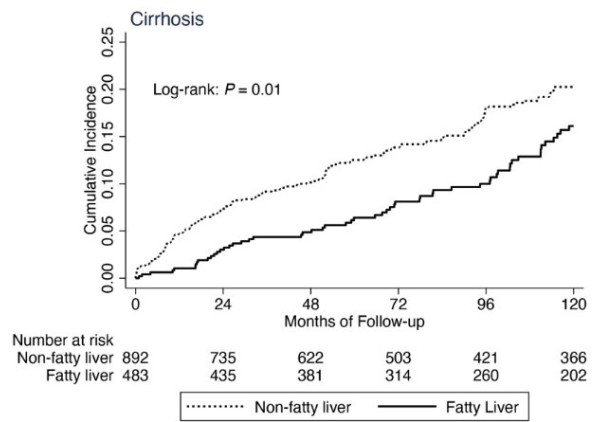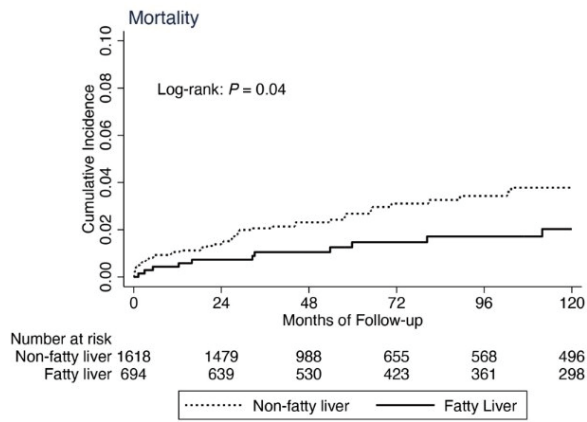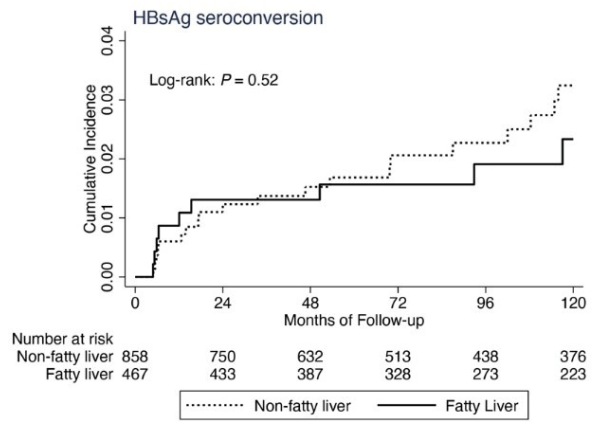

① Among patients with positive HBeAg  
**Supplementary Figure 3.** Continued.

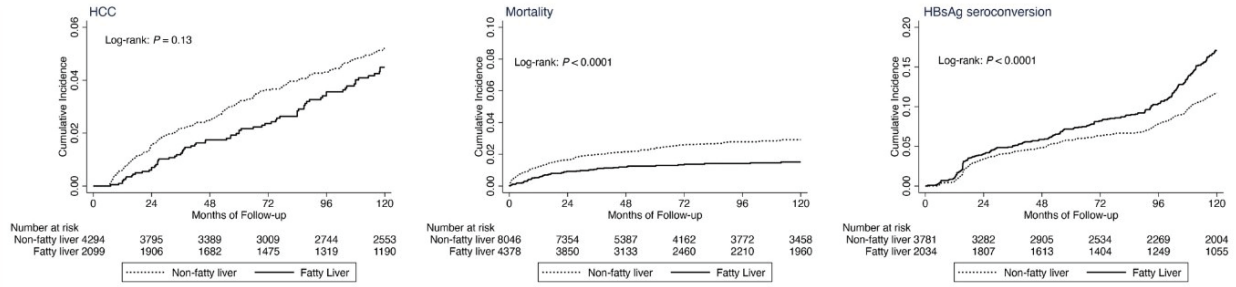

**J** Among patients without baseline cirrhosis

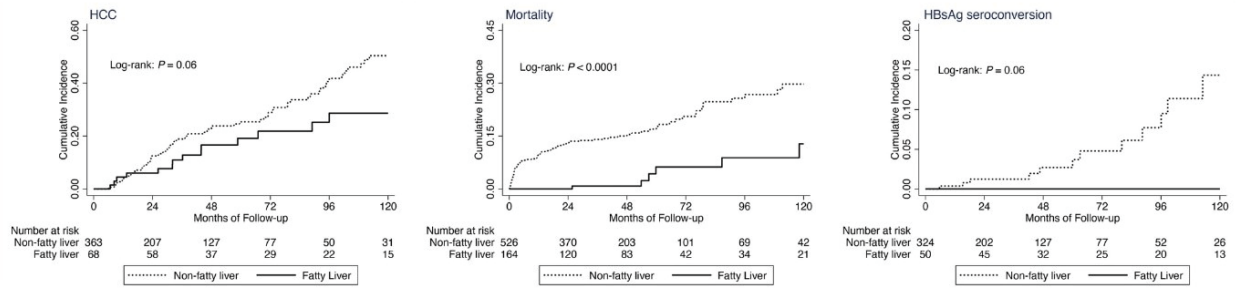

**K** Among patients with baseline cirrhosis

Supplementary Figure 3. Continued.

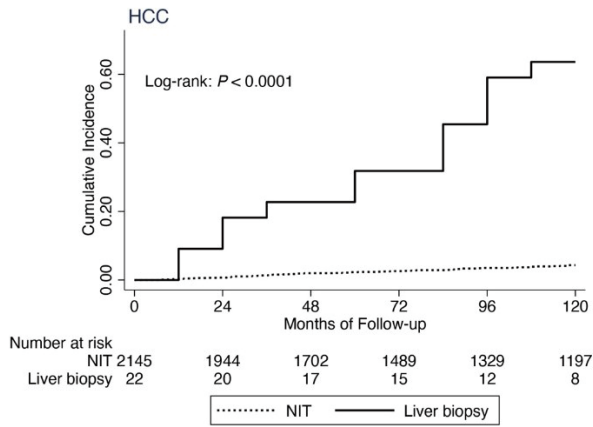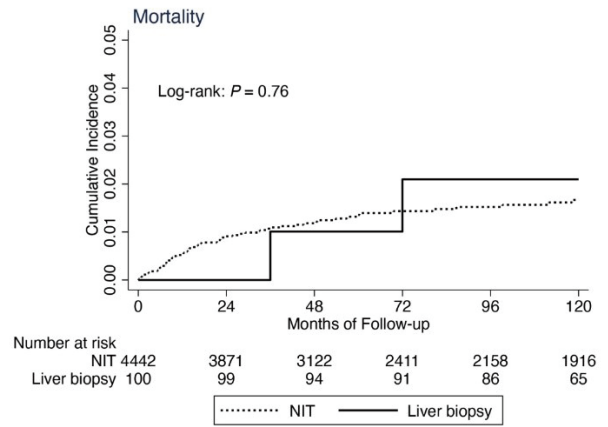

**L** Among all patients with fatty liver by fatty liver diagnosis type  
**Supplementary Figure 3.** Continued.
