# Supplementary material for: Impact of fatty liver on long-term outcomes in chronic hepatitis B: a systematic review and matched analysis of individual patient data meta-analysis
Source: PubMed Central journal article supplement — Clin Mol Hepatol. 2023 May 8;29(3):705–20. doi: 10.3350/cmh.2023.0004 (PMC10366810; doi:10.3350/cmh.2023.0004), 2023-05-08
Supplement: cmh-2023-0004-Supplementary-Fig-4.pdf [file cmh-2023-0004-Supplementary-Fig-4.pdf]

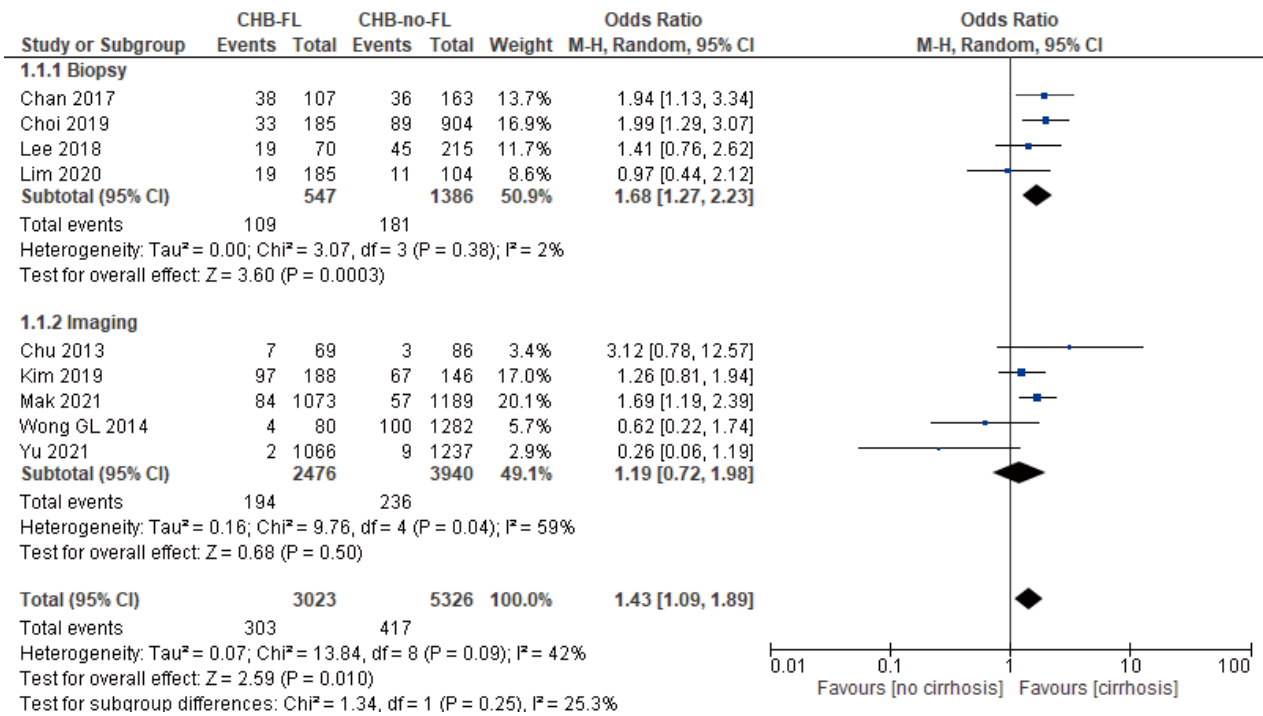

**Supplementary Figure 4.** Factors associated with baseline cirrhosis among chronic hepatitis B patients with and without fatty liver, stratified by diagnosis method of fatty liver. CHB, chronic hepatitis B; FL, fatty liver.
