# Supplementary material for: Impact of fatty liver on long-term outcomes in chronic hepatitis B: a systematic review and matched analysis of individual patient data meta-analysis
Source: PubMed Central journal article supplement — Clin Mol Hepatol. 2023 May 8;29(3):705–20. doi: 10.3350/cmh.2023.0004 (PMC10366810; doi:10.3350/cmh.2023.0004), 2023-05-08
Supplement: cmh-2023-0004-Supplementary-Table-2.pdf [file cmh-2023-0004-Supplementary-Table-2.pdf]

**Supplementary Table 2.** Search strategy

| PubMed                                                                                                                                                                                                                                                                                                                                                                                                                                                                                                                                                                                                                                                                                                                                                                                                                                                                                                                                                                                                                                                                                                                                                                                                                                                                                                                                                                                                                              | 845 articles  |
|-------------------------------------------------------------------------------------------------------------------------------------------------------------------------------------------------------------------------------------------------------------------------------------------------------------------------------------------------------------------------------------------------------------------------------------------------------------------------------------------------------------------------------------------------------------------------------------------------------------------------------------------------------------------------------------------------------------------------------------------------------------------------------------------------------------------------------------------------------------------------------------------------------------------------------------------------------------------------------------------------------------------------------------------------------------------------------------------------------------------------------------------------------------------------------------------------------------------------------------------------------------------------------------------------------------------------------------------------------------------------------------------------------------------------------------|---------------|
| <p>("Non-alcoholic Fatty Liver Disease"[mesh] OR ("non-alcoholic"[tw] OR "nonalcoholic") AND ("fatty liver"[mesh] OR "fatty liver"[tw] OR "fatty livers"[tw] OR "hepatic lipidosis" OR steatohepati*[tw])) OR (("NAFLD" OR "NAFL" OR "NASH") AND (liver[tw] OR steato*[tw] OR hepatic[tw])) AND ("Hepatitis B"[MeSH Terms] OR "Hepatitis B, Chronic"[MeSH Terms] OR "hepatitis b" OR ("hbv" OR "chb") AND (hepatitis OR liver)) AND (cancer[sb] OR "liver neoplasms"[Mesh] OR "Carcinoma, Hepatocellular"[MeSH Terms] OR "liver cancer" OR "liver neopla*" OR "hepatic neoplas*" OR "hepatocellular neoplas*" OR "hepatic cancer" OR "hepatocellular cancer" OR "liver carcinoma" OR "hepatic carcinoma" OR "hepatocellular carcinoma" OR ("hcc" AND (liver[tw] OR hepatic[tw] OR "hepatocellular"[tw])) OR ((cirrhosis OR fibrosis OR carcinoma OR sarcoma OR cancer OR neoplas*) AND (liver[tw] OR hepat*[tw])) OR "liver cirrhosis"[Mesh] OR "hepatic insufficiency"[Mesh] OR "liver failure"[Mesh] OR "liver failure" OR "hepatic insufficien*" OR mortality[tw] OR mortality[sh] OR death*[tw] OR complications[sh]) AND English[la] NOT (animals [mh] NOT humans [mh])) NOT (systematic[sb] OR Editorial[pt] OR Meta-Analysis[pt] OR review[pt])</p>                                                                                                                                                                          |               |
| EMBASE                                                                                                                                                                                                                                                                                                                                                                                                                                                                                                                                                                                                                                                                                                                                                                                                                                                                                                                                                                                                                                                                                                                                                                                                                                                                                                                                                                                                                              | 1657 articles |
| <p>('nonalcoholic fatty liver'/exp OR 'nonalcoholic steatohepatitis'/exp OR (('non-alcoholic':ti,ab,kw OR 'nonalcoholic') AND ('fatty liver'/exp OR 'fatty liver':ti,ab,kw OR 'fatty livers':ti,ab,kw OR 'hepatic lipidosis' OR steatohepati*:ti,ab,kw)) OR (('nafld' OR 'nafl' OR 'nash') AND (liver:ti,ab,kw OR steato*:ti,ab,kw OR hepatic:ti,ab,kw)) AND ('hepatitis b'/exp OR 'chronic hepatitis b'/exp OR 'acute hepatitis b'/exp OR 'hepatitis b' OR (('hbv' OR 'chb') AND (hepatitis OR liver)) AND ('liver cancer'/exp OR 'hepatobiliary system cancer'/de OR 'liver cancer' OR 'liver neopla*' OR 'hepatic neoplas*' OR 'hepatocellular neoplas*' OR 'hepatic cancer' OR 'hepatocellular cancer' OR 'liver carcinoma' OR 'hepatic carcinoma' OR 'hepatocellular carcinoma' OR ('hcc' AND (liver:ti,ab,kw OR hepatic:ti,ab,kw OR 'hepatocellular':ti,ab,kw)) OR ((cirrhosis OR fibrosis OR cancer OR neoplas* OR carcinoma OR sarcoma) AND (liver:ti,ab,kw OR hepat*:ti,ab,kw)) OR 'liver cirrhosis'/exp OR 'hepatic failure'/exp OR 'liver dysfunction'/exp OR 'liver failure' OR 'hepatic insufficien*' OR 'liver insufficien*' OR mortality:ti,ab,kw OR death*:ti,ab,kw OR complications/lnk) AND [english]/lim AND ('article'/it OR 'article in press'/it OR 'erratum'/it OR 'letter'/it OR 'note'/it OR 'short survey'/it) NOT ('animal'/exp NOT 'humans'/exp) NOT ('systematic review'/de OR 'meta analysis'/de)</p> |               |
| Cochrane Library                                                                                                                                                                                                                                                                                                                                                                                                                                                                                                                                                                                                                                                                                                                                                                                                                                                                                                                                                                                                                                                                                                                                                                                                                                                                                                                                                                                                                    | 12 articles   |
| <p>("nonalcoholic fatty liver" OR "nonalcoholic steatohepatitis" OR (("non-alcoholic" OR "nonalcoholic") AND ("fatty liver" OR "fatty livers" OR "hepatic lipidosis" OR steatohepati*)) OR (("nafld" OR "nafl" OR "nash") AND (liver OR steato* OR hepatic)) AND ("hepatitis b" OR "chronic hepatitis b" OR "acute hepatitis b" OR "hepatitis b" OR ("hbv" OR "chb") AND (hepatitis OR liver)) AND ("liver cancer" OR "hepatobiliary system cancer" OR "liver neoplas*" OR "hepatic neoplas*" OR "hepatocellular neoplas*" OR "hepatic cancer" OR "hepatocellular cancer" OR "liver carcinoma" OR "hepatic carcinoma" OR "hepatocellular carcinoma" OR ("hcc" AND (liver OR hepatic OR "hepatocellular"))) OR ((cirrhosis OR fibrosis OR cancer OR neoplas* OR carcinoma OR sarcoma) AND (liver OR hepat*)) OR "liver cirrhosis" OR "hepatic failure" OR "liver dysfunction" OR "liver failure" OR "hepatic insufficien*" OR "liver insufficien*" OR mortality OR death* OR complication*)</p>                                                                                                                                                                                                                                                                                                                                                                                                                                      |               |
| Web of Science                                                                                                                                                                                                                                                                                                                                                                                                                                                                                                                                                                                                                                                                                                                                                                                                                                                                                                                                                                                                                                                                                                                                                                                                                                                                                                                                                                                                                      | 864 articles  |
| <p>(TS=(("nonalcoholic fatty liver" OR "nonalcoholic steatohepatitis" OR (("non-alcoholic" OR "nonalcoholic") AND ("fatty liver" OR "fatty livers" OR "hepatic lipidosis" OR steatohepati*)) OR (("nafld" OR "nafl" OR "nash") AND (liver OR steato* OR hepatic)) AND ("hepatitis b" OR "chronic hepatitis b" OR "acute hepatitis b" OR "hepatitis b" OR ("hbv" OR "chb") AND (hepatitis OR liver)) AND ("liver cancer" OR "hepatobiliary system cancer" OR "liver neoplas*" OR "hepatic neoplas*" OR "hepatocellular neoplas*" OR "hepatic cancer" OR "hepatocellular cancer" OR "liver carcinoma" OR "hepatic carcinoma" OR "hepatocellular carcinoma" OR ("hcc" AND (liver OR hepatic OR "hepatocellular"))) OR ((cirrhosis OR fibrosis OR cancer OR neoplas* OR carcinoma OR sarcoma) AND (liver OR hepat*)) OR "liver cirrhosis" OR "hepatic failure" OR "liver dysfunction" OR "liver failure" OR "hepatic insufficien*" OR "liver insufficien*" OR mortality OR death* OR complication*)) AND (DT==(ARTICLE OR EARLY ACCESS OR LETTER OR RETRACTED PUBLICATION))</p>                                                                                                                                                                                                                                                                                                                                                         |               |
