# Supplementary material for: Impact of fatty liver on long-term outcomes in chronic hepatitis B: a systematic review and matched analysis of individual patient data meta-analysis
Source: PubMed Central journal article supplement — Clin Mol Hepatol. 2023 May 8;29(3):705–20. doi: 10.3350/cmh.2023.0004 (PMC10366810; doi:10.3350/cmh.2023.0004), 2023-05-08
Supplement: cmh-2023-0004-Supplementary-Table-3.pdf [file cmh-2023-0004-Supplementary-Table-3.pdf]

**Supplementary Table 3.** Quality assessment of observational studies using Newcastle–Ottawa Scale

| No | Author, year                         | Selection                                          |                                               |                                     | Comparability                                                                      |                                                                                                      |                                 | Outcome                                                   |                                            | Overall score |
|----|--------------------------------------|----------------------------------------------------|-----------------------------------------------|-------------------------------------|------------------------------------------------------------------------------------|------------------------------------------------------------------------------------------------------|---------------------------------|-----------------------------------------------------------|--------------------------------------------|---------------|
|    |                                      | Representativeness of the exposed cohort (1 point) | Selection of the non-exposed cohort (1 point) | Ascertainment of exposure (1 point) | Demonstration that outcome of interest was not present at start of study (1 point) | Comparability of cohorts on the basis of the design or analysis controlled for confounders (2 point) | Assessment of outcome (1 point) | Was follow-up long enough for outcomes to occur (1 point) | Adequacy of follow-up of cohorts (1 point) |               |
| 1  | Bacaksiz et al. <sup>20</sup> , 2021 | 1                                                  | 1                                             | 1                                   | 0                                                                                  | 0                                                                                                    | 1                               | 1                                                         | 1                                          | 6             |
| 2  | Chang et al. <sup>21</sup> , 2021    | 1                                                  | 1                                             | 1                                   | 1                                                                                  | 2                                                                                                    | 1                               | 1                                                         | 1                                          | 9             |
| 3  | Li et al. <sup>12</sup> , 2021       | 1                                                  | 1                                             | 1                                   | 1                                                                                  | 2                                                                                                    | 1                               | 1                                                         | 1                                          | 9             |
| 4  | Mak et al. <sup>10</sup> , 2021      | 1                                                  | 1                                             | 1                                   | 1                                                                                  | 2                                                                                                    | 1                               | 1                                                         | 1                                          | 9             |
| 5  | Yu et al. <sup>25</sup> , 2021       | 1                                                  | 1                                             | 1                                   | 1                                                                                  | 1                                                                                                    | 1                               | 1                                                         | 1                                          | 8             |
| 6  | Con et al. <sup>11</sup> , 2020      | 1                                                  | 1                                             | 1                                   | 1                                                                                  | 2                                                                                                    | 1                               | 1                                                         | 1                                          | 9             |
| 7  | Lim et al. <sup>9</sup> , 2020       | 1                                                  | 1                                             | 1                                   | 0                                                                                  | 2                                                                                                    | 1                               | 1                                                         | 1                                          | 8             |
| 8  | Wong et al. <sup>15</sup> , 2020     | 1                                                  | 1                                             | 1                                   | 1                                                                                  | 2                                                                                                    | 1                               | 1                                                         | 1                                          | 9             |
| 9  | Choi et al. <sup>8</sup> , 2020      | 1                                                  | 1                                             | 1                                   | 1                                                                                  | 2                                                                                                    | 1                               | 1                                                         | 1                                          | 9             |
| 10 | Kim et al. <sup>13</sup> , 2019      | 1                                                  | 1                                             | 1                                   | 0                                                                                  | 0                                                                                                    | 1                               | 1                                                         | 1                                          | 6             |
| 11 | Peleg et al. <sup>7</sup> , 2019     | 1                                                  | 1                                             | 1                                   | 1                                                                                  | 2                                                                                                    | 1                               | 1                                                         | 1                                          | 9             |
| 12 | Chen et al. <sup>16</sup> , 2017     | 1                                                  | 1                                             | 1                                   | 0                                                                                  | 1                                                                                                    | 1                               | 1                                                         | 0                                          | 6             |
| 13 | Chan et al. <sup>5</sup> , 2017      | 1                                                  | 1                                             | 1                                   | 0                                                                                  | 1                                                                                                    | 1                               | 1                                                         | 1                                          | 7             |
| 14 | Lee et al. <sup>6</sup> , 2019       | 1                                                  | 1                                             | 1                                   | 0                                                                                  | 2                                                                                                    | 1                               | 1                                                         | 1                                          | 8             |
| 15 | Ieluzzi et al. <sup>18</sup> , 2014  | 1                                                  | 1                                             | 1                                   | 0                                                                                  | 1                                                                                                    | 1                               | 1                                                         | 1                                          | 7             |
| 16 | Mak et al. <sup>23</sup> , 2020      | 1                                                  | 1                                             | 1                                   | 0                                                                                  | 1                                                                                                    | 1                               | 1                                                         | 1                                          | 7             |
| 17 | Gong et al. <sup>24</sup> , 2015     | 1                                                  | 1                                             | 1                                   | 0                                                                                  | 0                                                                                                    | 1                               | 0                                                         | 1                                          | 5             |
| 18 | Chu et al. <sup>22</sup> , 2013      | 1                                                  | 1                                             | 1                                   | 0                                                                                  | 0                                                                                                    | 1                               | 1                                                         | 1                                          | 6             |
| 19 | Wong et al. <sup>14</sup> , 2014     | 1                                                  | 1                                             | 1                                   | 1                                                                                  | 0                                                                                                    | 1                               | 1                                                         | 1                                          | 7             |

Quality assessment performed based on HCC or primary outcomes (when HCC is not reported).
