# Supplementary material for: Impact of fatty liver on long-term outcomes in chronic hepatitis B: a systematic review and matched analysis of individual patient data meta-analysis
Source: PubMed Central journal article supplement — Clin Mol Hepatol. 2023 May 8;29(3):705–20. doi: 10.3350/cmh.2023.0004 (PMC10366810; doi:10.3350/cmh.2023.0004), 2023-05-08
Supplement: cmh-2023-0004-Supplementary-Table-4.pdf [file cmh-2023-0004-Supplementary-Table-4.pdf]

**Supplementary Table 4.** Summary of included studies on chronic hepatitis B with or without fatty liver

| No                              | Author, year                        | Country              | Study design  | Study site    | Fatty liver diagnosis method | Follow-up duration, (mean/*median months) | Study patient | Mean age, years | Male, % | Fatty liver, % | Outcomes %                  |
|---------------------------------|-------------------------------------|----------------------|---------------|---------------|------------------------------|-------------------------------------------|---------------|-----------------|---------|----------------|-----------------------------|
| <b>Hepatocellular carcinoma</b> |                                     |                      |               |               |                              |                                           |               |                 |         |                |                             |
| 1                               | Chang et al. <sup>21</sup> , 2021   | South Korea          | Retrospective | Single center | TE                           | 36                                        | 720           | 52              | 58.2    | 44.9           | 6.4% over 3 years           |
| 2                               | Li et al. <sup>12</sup> , 2021      | USA & Taiwan         | Retrospective | Multicenter   | US or CT                     | 131.9                                     | 6,786         | 46.2            | 63.5    | 31.6           | 5.5% over 10 years          |
| 3                               | Mak et al. <sup>10</sup> , 2021     | Hong Kong            | Prospective   | Single center | TE                           | 46.4*                                     | 2,403         | 55.6            | 55.3    | 48.1           | 2.0% over 21.7 months       |
| 4                               | Con et al. <sup>11</sup> , 2020     | Australia            | Retrospective | Single center | US                           | NR                                        | 694           | 44.2            | 47      | 25             | NR                          |
| 5                               | Lim et al. <sup>9</sup> , 2020      | Singapore            | Retrospective | Single center | Liver biopsy                 | 111.1*                                    | 289           | 45.2            | 72.3    | 64             | 9.3% over 111 months        |
| 6                               | Wong et al. <sup>15</sup> , 2020    | Malaysia             | Retrospective | Single center | TE                           | 80.0*                                     | 614           | 60              | 47.4    | 47.9           | 0.22 per 100 person-years   |
| 7                               | Choi et al. <sup>8</sup> , 2020     | Netherlands & Canada | Retrospective | Multicenter   | Liver biopsy                 | 120.0*                                    | 1,089         | 38              | 65.9    | 32.3           | 0.29 per 100 person-years   |
| 8                               | Kim et al. <sup>13</sup> , 2019     | South Korea          | Retrospective | Single center | TE                           | 38.6                                      | 334           | 51              | 62.9    | 43.7           | 7.5% over 5 years           |
| 9                               | Peleg et al. <sup>7</sup> , 2019    | Israel               | Retrospective | Single center | US                           | 73.6                                      | 524           | 46.1            | 60.1    | 46             | 3.4% over                   |
| 10                              | Lee et al. <sup>6</sup> , 2019      | Korea                | Retrospective | Single center | Liver biopsy                 | 63.6*                                     | 321           | 41              | 61.1    | 78.1           | 3.2% over 5 years           |
| 11                              | Chan et al. <sup>5</sup> , 2017     | Hong Kong            | Retrospective | Single center | Liver biopsy                 | 79.9*                                     | 270           | 43.6            | 75.2    | 39.6           | 3.4% over 70 months         |
| 12                              | Ieluzzi et al. <sup>18</sup> , 2014 | Italy                | Prospective   | Single center | US & Liver biopsy            | 276                                       | 105           | NR              | 76      | 3.8            | 0.33 per 100 person-years   |
| <b>Cirrhosis</b>                |                                     |                      |               |               |                              |                                           |               |                 |         |                |                             |
| 1                               | Chu et al. <sup>22</sup> , 2013     | Taiwan               | Retrospective | Single center | US                           | 82.8                                      | 155           | 51.3            | 70.3    | 44.5           | -                           |
| 2                               | Li et al. <sup>12</sup> , 2021      | USA & Taiwan         | Retrospective | Multicenter   | US or CT                     | 131.9                                     | 6,786         | 46.2            | 63.5    | 31.6           | Cumulative incidence:       |
| 3                               | Mak et al. <sup>10</sup> , 2021     | Hong Kong            | Prospective   | Single center | TE                           | 46.4                                      | 2,403         | 55.6            | 55.3    | 48.1           | -                           |
| 4                               | Chen et al. <sup>16</sup> , 2017    | China                | Prospective   | Single center | Liver biopsy                 | 60                                        | 162           | 33.6            | 73.4    | 47.5           | 4.9% over 5 years           |
| 5                               | Ieluzzi et al. <sup>18</sup> , 2014 | Italy                | Prospective   | Single center | US & Liver biopsy            | 276                                       | 105           | NR              | 76      | 3.8            | 1.56 per 100 person-years   |
| <b>Death</b>                    |                                     |                      |               |               |                              |                                           |               |                 |         |                |                             |
| 1                               | Li et al. <sup>12</sup> , 2021      | USA & Taiwan         | Retrospective | Multicenter   | US or CT                     | 131.9                                     | 6,786         | 46.2            | 63.5    | 31.6           | 5.2% over 10 years          |
| 2                               | Lim et al. <sup>9</sup> , 2020      | Singapore            | Retrospective | Single center | Liver biopsy                 | 111.1*                                    | 289           | 45.2            | 72.3    | 64             | 3.5% over median 111 months |
| 3                               | Wong et al. <sup>15</sup> , 2020    | Malaysia             | Retrospective | Single center | TE                           | 80.0*                                     | 614           | 60              | 47.4    | 47.9           | 0.87 per 100 person-years   |
| 4                               | Choi et al. <sup>8</sup> , 2020     | Netherlands & Canada | Retrospective | Multicenter   | Liver biopsy                 | 120.0*                                    | 1,089         | 38              | 65.9    | 32.3           | 0.20 per 100 person-years   |
| 5                               | Peleg et al. <sup>7</sup> , 2019    | Israel               | Retrospective | Single center | US                           | 73.6                                      | 524           | 46.1            | 60.1    | 46             | 3.5% over median 70 months  |
| <b>HBsAg seroconversion</b>     |                                     |                      |               |               |                              |                                           |               |                 |         |                |                             |
| 1                               | Li et al. <sup>12</sup> , 2021      | USA & Taiwan         | Retrospective | Multicenter   | US or CT                     | 131.9                                     | 6,786         | 46.2            | 63.5    | 31.6           | 10 years                    |
| 2                               | Chang et al. <sup>21</sup> , 2021   | South Korea          | Retrospective | Single center | TE                           | 36                                        | 720           | 52              | 58.2    | 44.9           | 10.3% over 3 years          |

**Supplementary Table 4.** Continued

| No | Author, year                        | Country   | Study design  | Study site    | Fatty liver diagnosis method | Follow-up duration, (mean/*median months) | Study patient | Mean age, years | Male, % | Fatty liver, % | Outcomes %                |
|----|-------------------------------------|-----------|---------------|---------------|------------------------------|-------------------------------------------|---------------|-----------------|---------|----------------|---------------------------|
| 3  | Chu et al. <sup>22</sup> , 2013     | Taiwan    | Retrospective | Single center | US                           | 82.8                                      | 155           | 51.3            | 70.3    | 44.5           | 58.1% over                |
| 4  | Bacakaz et al. <sup>20</sup> , 2021 | Turkey    | Retrospective | Single center | US                           | 127.2                                     | 404           | 36.2            | 55.0    | 40.3           | 12.8% over                |
| 5  | Gong et al. <sup>24</sup> , 2015    | China     | Prospective   | Single center | Liver biopsy                 | 12                                        | 89            | 28              | 73.1    | 34.8           | 5.6% over 1 year          |
| 6  | Yu et al. <sup>25</sup> , 2021      | Taiwan    | Prospective   | Single center | US                           | 72                                        | 1,230         | 45.3            | 100.0   | 46.2           | 0.03 per 100 person-years |
| 7  | Mak et al. <sup>10</sup> , 2021     | Hong Kong | Prospective   | Single center | TE                           | 120                                       | 1,089         | 54.6            | 51.3    | 48.2           | 6.7% over 3 years         |

FL, fatty liver; US, ultrasound; TE, transient elastography; CT, computer tomography; HCC, hepatocellular carcinoma; HBsAg, hepatitis B surface antigen.
