# Supplementary material for: Impact of fatty liver on long-term outcomes in chronic hepatitis B: a systematic review and matched analysis of individual patient data meta-analysis
Source: PubMed Central journal article supplement — Clin Mol Hepatol. 2023 May 8;29(3):705–20. doi: 10.3350/cmh.2023.0004 (PMC10366810; doi:10.3350/cmh.2023.0004), 2023-05-08
Supplement: cmh-2023-0004-Supplementary-Table-5.pdf [file cmh-2023-0004-Supplementary-Table-5.pdf]

**Supplementary Table 5.** Aggregated study-level data meta-analysis: Subgroup analysis for (A) Hepatocellular carcinoma, (B) cirrhosis, (C) mortality, and (D) HBsAg seroclerance in CHB patients with and without concomitant FLD

(A) Hepatocellular carcinoma

| Studies                              |   | Events/patients | Incidence per 1,000 person-years | $I^2$ | P-value |
|--------------------------------------|---|-----------------|----------------------------------|-------|---------|
| <b>Subgroup</b>                      |   |                 |                                  |       |         |
| <b>Diagnosis</b>                     |   |                 |                                  |       |         |
| <i>Imaging</i>                       |   |                 |                                  |       |         |
| Overall                              | 2 | 285/7,480       | 2.2 (0.00–5.3)                   | 98.2  |         |
| CHB-no FL                            | 2 | 224/5,166       | 6.0 (2.3–9.8)                    | 91.3  | 0.27    |
| CHB-FL                               | 2 | 61/2,314        | 9.4 (4.7–14.1)                   | 88.7  |         |
| <i>Biopsy</i>                        |   |                 |                                  |       |         |
| Overall                              | 5 | 108/2,493       | 6.5 (3.7–9.4)                    | 83.6  |         |
| CHB-no FL                            | 5 | 40/1,705        | 2.9 (1.3–4.5)                    | 39.2  | 0.002   |
| CHB-FL                               | 5 | 68/788          | 12.6 (6.7–18.5)                  | 63.5  |         |
| <i>Transient elastography</i>        |   |                 |                                  |       |         |
| Overall                              | 4 | 125/4,041       | 12.5 (2.1–22.9)                  | 93.6  |         |
| CHB-no FL                            | 4 | 81/2,133        | 13.6 (2.5–24.7)                  | 89.5  | 0.6028  |
| CHB-FL                               | 4 | 44/1,908        | 9.6 (0.00–19.5)                  | 87.1  |         |
| <b>Ethnicity</b>                     |   |                 |                                  |       |         |
| <i>Asian</i>                         |   |                 |                                  |       |         |
| Overall                              | 9 | 497/12,796      | 8.7 (4.1–13.3)                   | 89.3  |         |
| CHB-no FL                            | 9 | 339/8,200       | 7.4 (2.8–12.0)                   | 86.5  | 0.3703  |
| CHB-FL                               | 9 | 158/4,596       | 10.7 (5.1–16.2)                  | 86.4  |         |
| <i>Non-Asian</i>                     |   |                 |                                  |       |         |
| Overall                              | 2 | 21/1,218        | 3.1 (0.00–8.2)                   | 92.6  |         |
| CHB-no FL                            | 2 | 6/804           | 1.1 (0.00–2.8)                   | 54    | 0.4222  |
| CHB-FL                               | 2 | 15/414          | 4.9 (0.00–14.1)                  | 91.4  |         |
| <b>Population size</b>               |   |                 |                                  |       |         |
| <i>&lt;500</i>                       |   |                 |                                  |       |         |
| Overall                              | 4 | 80/1,214        | 11.4 (5.2–17.6)                  | 75.5  |         |
| CHB-no FL                            | 5 | 84/989          | 7.2 (0.3–14.2)                   | 78.6  | 0.5799  |
| CHB-FL                               | 8 | 34/1,390        | 9.8 (4.1–15.4)                   | 88.1  |         |
| <i>≥500</i>                          |   |                 |                                  |       |         |
| Overall                              | 7 | 438/12,800      | 5.6 (1.0–10.1)                   | 94.2  |         |
| CHB-no FL                            | 6 | 307/8,015       | 5.5 (0.6–10.4)                   | 94.8  | 0.5604  |
| CHB-FL                               | 3 | 93/3,620        | 9.0 (0.0–19.7)                   | 90    |         |
| <b>Treatment</b>                     |   |                 |                                  |       |         |
| <i>Untreated</i>                     |   |                 |                                  |       |         |
| Overall                              | 3 | 112/3,647       | 10.4 (0.5–20.4)                  | 92    |         |
| CHB-no FL                            | 3 | 65/1,927        | 9.6 (0.00–20.0)                  | 91.1  | 0.8938  |
| CHB-FL                               | 3 | 47/1,720        | 10.6 (0.2–21.1)                  | 90.8  |         |
| <i>Mixed treated &amp; untreated</i> |   |                 |                                  |       |         |
| Overall                              | 7 | 381/10,033      | 4.7 (2.1–7.2)                    | 92.6  |         |

**Supplementary Table 5.** Continued

| Studies        |   | Events/patients | Incidence per 1,000 person-years | $I^2$ | P-value |
|----------------|---|-----------------|----------------------------------|-------|---------|
| CHB-no FL      | 7 | 263/6,889       | 2.9 (1.4–4.4)                    | 91.4  | 0.0861  |
| CHB-FL         | 7 | 118/3,144       | 8.3 (2.3–14.3)                   | 90.1  |         |
| <i>Treated</i> |   |                 |                                  |       |         |
| Overall        | 1 | 25/334          | 23.3 (14.1–32.4)                 | N/A   |         |
| CHB-no FL      | 1 | 17/188          | 28.1 (14.7–41.5)                 | N/A   | 0.2234  |
| CHB-FL         | 1 | 8/146           | 17.0 (5.2–28.8)                  | N/A   |         |

**Supplementary Table 5.** Continued  
(B) Cirrhosis

| Studies                              |   | Events/Patients | Incidence rate per 1,000 person-years | $I^2$ | P-value |
|--------------------------------------|---|-----------------|---------------------------------------|-------|---------|
| Subgroup                             |   |                 |                                       |       |         |
| Diagnosis                            |   |                 |                                       |       |         |
| <i>Imaging</i>                       |   |                 |                                       |       |         |
| Overall                              | 2 | 759/6,941       | 6.6 (0.0–13.8)                        | 94.9  |         |
| CHB-no FL                            | 2 | 561/4,728       | 6.0 (0.0–15.9)                        | 98.3  | 0.5814  |
| CHB-FL                               | 2 | 198/2,206       | 8.3 (7.1–9.4)                         | 0     |         |
| <i>Biopsy</i>                        |   |                 |                                       |       |         |
| Overall                              | 2 | 40/267          | 13.1 (7.6–18.7)                       | 39.6  |         |
| CHB-no FL                            | 2 | 36/186          | 12.8 (8.6–17.0)                       | 0     | 0.4082  |
| CHB-FL                               | 2 | 4/81            | 8.8 (0.4–17.2)                        | 0     |         |
| Ethnicity                            |   |                 |                                       |       |         |
| <i>Asian</i>                         |   |                 |                                       |       |         |
| Overall                              | 3 | 43/7,103        | 7.5 (2.4–12.6)                        | 87.9  |         |
| CHB-no FL                            | 3 | 565/4,813       | 6.8 (0.0–13.6)                        | 96.6  | 0.6784  |
| CHB-FL                               | 3 | 202/2,283       | 8.3 (7.1–9.4)                         | 0     |         |
| <i>Non-Asian</i>                     |   |                 |                                       |       |         |
| Overall                              | 1 | 32/105          | 15.6 (10.2–21.0)                      |       |         |
| CHB-no FL                            | 1 | 32/101          | 13.7 (8.9–18.4)                       |       | 0.3009  |
| CHB-FL                               | 1 | 0/4             | 5.4 (0.0–20.3)                        |       |         |
| Population size                      |   |                 |                                       |       |         |
| <i>&lt;500</i>                       |   |                 |                                       |       |         |
| Overall                              | 3 | 43/422          | 9.2 (1.5–16.8)                        | 96.10 |         |
| CHB-no FL                            | 3 | 36/269          | 7.6 (0.0–15.7)                        | 91.6  | 0.9968  |
| CHB-FL                               | 3 | 7/146           | 7.6 (2.0–13.3)                        | 0     |         |
| <i>&gt;500</i>                       |   |                 |                                       |       |         |
| Overall                              | 1 | 756/6,786       | 10.1 (9.4–10.9)                       | N/A   |         |
| CHB-no FL                            | 1 | 561/4,645       | 11.0 (10.1–11.9)                      | N/A   | 0.0002  |
| CHB-FL                               | 1 | 195/2,141       | 8.3 (7.1–9.5)                         | N/A   |         |
| Treatment                            |   |                 |                                       |       |         |
| <i>Untreated</i>                     |   |                 |                                       |       |         |
| Overall                              | 2 | 35/253          | 9.0 (0.0–21.5)                        | 93.8  |         |
| CHB-no FL                            | 2 | 32/184          | 7.1 (0.0–19.6)                        | 95.5  | 0.9261  |
| CHB-FL                               | 2 | 7/146           | 6.4 (0.0–13.2)                        | 0     |         |
| <i>Mixed treated &amp; untreated</i> |   |                 |                                       |       |         |
| Overall                              | 2 | 764/6,948       | 10.1 (9.4–10.9)                       | 0     |         |
| CHB-no FL                            | 2 | 565/4,730       | 11.0 (10.1–11.9)                      | 0     | 0.0004  |
| CHB-FL                               | 2 | 199/2,218       | 8.3 (7.2–9.5)                         | 0     |         |
| Treated (no study)                   |   |                 |                                       |       |         |

**Supplementary Table 5.** Continued

(C) Mortality

| Studies                              |   | Events/Patients | Incidence rate per 1,000 person-years | $I^2$ | P-value |
|--------------------------------------|---|-----------------|---------------------------------------|-------|---------|
| <b>Subgroup</b>                      |   |                 |                                       |       |         |
| <b>Diagnosis</b>                     |   |                 |                                       |       |         |
| <i>Imaging</i>                       |   |                 |                                       |       |         |
| Overall                              | 1 | 430/6,786       | 5.1 (2.9–7.2)                         | N/A   |         |
| CHB-no FL                            | 1 | 287/4,645       | 5.6 (5.0–6.3)                         | N/A   | <0.01   |
| CHB-FL                               | 1 | 64/2,141        | 2.7 (2.1–3.4)                         | N/A   |         |
| <i>Biopsy</i>                        |   |                 |                                       |       |         |
| Overall                              | 3 | 59/1,902        | 4.4 (1.4–7.4)                         | 85.7  |         |
| CHB-no FL                            | 3 | 29/1,291        | 2.9 (0.5–5.2)                         | 45    | 0.24    |
| CHB-FL                               | 3 | 30/611          | 5.9 (1.4–10.3)                        | 70.3  |         |
| <i>Transient elastography</i>        |   |                 |                                       |       |         |
| Overall                              | 1 | 20/578          | 8.7 (4.9–12.5)                        | N/A   |         |
| CHB-no FL                            | 1 | 15/298          | 13.5 (6.6–20.3)                       | N/A   | 0.03    |
| CHB-FL                               | 1 | 5/280           | 4.8 (0.6–9.0)                         | N/A   |         |
| <b>Ethnicity</b>                     |   |                 |                                       |       |         |
| <i>Asian</i>                         |   |                 |                                       |       |         |
| Overall                              | 4 | 410/8,742       | 4.8 (2.3–7.4)                         | 92.6  |         |
| CHB-no FL                            | 4 | 327/5,951       | 6.2 (2.0–10.4)                        | 93.7  | 0.14    |
| CHB-FL                               | 4 | 83/2,791        | 3.0 (2.2–3.8)                         | 0     |         |
| <i>Non-Asian</i>                     |   |                 |                                       |       |         |
| Overall                              | 1 | 20/524          | 6.5 (3.7–9.4)                         | N/A   |         |
| CHB-no FL                            | 1 | 4/283           | 2.4 (0.0–4.8)                         | N/A   | <0.01   |
| CHB-FL                               | 1 | 16/241          | 11.4 (5.8–17.0)                       | N/A   |         |
| <b>Population size</b>               |   |                 |                                       |       |         |
| <i>&lt;300</i>                       |   |                 |                                       |       |         |
| Overall                              | 3 | 1,391           | 6.6 (4.9–8.4)                         | 0     |         |
| CHB-no FL                            | 3 | 26/685          | 7.1 (0.9–13.3)                        | 81    | 0.63    |
| CHB-FL                               | 4 | 35/891          | 5.4 (2.4–8.4)                         | 55.4  |         |
| <i>≥300</i>                          |   |                 |                                       |       |         |
| Overall                              | 2 | 7,875           | 3.4 (0.7–6.0)                         | 97    |         |
| CHB-no FL                            | 2 | 305/5,549       | 3.8 (0.3–7.4)                         | 97.5  | 0.55    |
| CHB-FL                               | 1 | 64/2,141        | 2.7 (2.1–3.4)                         | N/A   |         |
| <b>Treatment</b>                     |   |                 |                                       |       |         |
| <i>Untreated</i>                     |   |                 |                                       |       |         |
| Overall                              | 1 | 20/524          | 6.5 (3.7–9.4)                         | N/A   |         |
| CHB-no FL                            | 1 | 4/283           | 2.4 (0.0–4.8)                         | N/A   | <0.01   |
| CHB-FL                               | 1 | 16/241          | 11.4 (5.8–17.0)                       | N/A   |         |
| <i>Mixed treated &amp; untreated</i> |   |                 |                                       |       |         |
| Overall                              | 4 | 410/8,742       | 4.8 (2.3–7.4)                         | 92.6  |         |
| CHB-no FL                            | 4 | 327/5,951       | 6.2 (2.0–10.4)                        | 93.7  | 0.15    |
| CHB-FL                               | 4 | 83/2,791        | 3.0 (2.2–3.8)                         | 0     |         |

*Treated (no study)*

**Supplementary Table 5.** Continued  
(D) HBsAg seroclearance

| Studies                              |   | Events/Persons | Incidence rate per 1,000 person-years | $I^2$ | P-value |
|--------------------------------------|---|----------------|---------------------------------------|-------|---------|
| <b>Subgroup</b>                      |   |                |                                       |       |         |
| <i>Diagnosis</i>                     |   |                |                                       |       |         |
| <i>Imaging</i>                       |   |                |                                       |       |         |
| Overall                              | 4 | 819/8,575      | 27.9 (0.0–63.2)                       | 99.0  |         |
| CHB-no FL                            | 4 | 455/5,587      | 26.5 (0.0–62.7)                       | 96.2  | 0.87    |
| CHB-FL                               | 4 | 364/2,736      | 30.6 (0.3–60.9)                       | 96.1  |         |
| <i>Biopsy</i>                        |   |                |                                       |       |         |
| Overall                              | 1 | 5/89           | 61.3 (7.6–115.0)                      | N/A   |         |
| CHB-no FL                            | 1 | 3/58           | 56.4 (0.0–120.3)                      | N/A   | 0.81    |
| CHB-FL                               | 1 | 2/31           | 70.4 (0.0–167.9)                      | N/A   |         |
| <i>Transient elastography</i>        |   |                |                                       |       |         |
| Overall                              | 2 | 96/1,050       | 28.5 (16.7–40.3)                      | 73.6  |         |
| CHB-no FL                            | 2 | 52/553         | 24.9 (0.0–53.1)                       | 93.2  | 0.77    |
| CHB-FL                               | 2 | 44/497         | 29.3 (20.7–38.0)                      | 0     |         |
| <b>Population size</b>               |   |                |                                       |       |         |
| <i>&lt;300</i>                       |   |                |                                       |       |         |
| Overall                              | 4 | 169/978        | 42.0 (6.2–77.9)                       | 96    |         |
| CHB-no FL                            | 4 | 78/541         | 36.7 (0.0–76.8)                       | 93.5  | 0.78    |
| CHB-FL                               | 4 | 91/437         | 44.1 (10.3–77.9)                      | 89.3  |         |
| <i>&gt;300</i>                       |   |                |                                       |       |         |
| Overall                              | 3 | 751/8,736      | 17.9 (2.0–33.8)                       | 98    |         |
| CHB-no FL                            | 3 | 432/5,657      | 19.1 (0.0–38.3)                       | 97.1  | 0.98    |
| CHB-FL                               | 3 | 319/2,827      | 19.4 (7.2–31.5)                       | 96.2  |         |
| <b>Treatment</b>                     |   |                |                                       |       |         |
| <i>Untreated</i>                     |   |                |                                       |       |         |
| Overall                              | 2 | 164/875        | 58.6 (9.7–107.5)                      | 96.2  |         |
| CHB-no FL                            | 2 | 98/483         | 61.5 (16.0–107.0)                     | 91.8  | 0.82    |
| CHB-FL                               | 2 | 66/392         | 53.6 (0.7–106.5)                      | 93.1  |         |
| <i>Mixed treated &amp; untreated</i> |   |                |                                       |       |         |
| Overall                              | 3 | 699/8,346      | 13.4 (4.9–21.8)                       | 96.9  |         |
| CHB-no FL                            | 3 | 390/5,416      | 9.9 (4.2–15.7)                        | 94.4  | 0.18    |
| CHB-FL                               | 3 | 309/2,678      | 20.3 (6.4–34.1)                       | 96    |         |
| <i>Treated</i>                       |   |                |                                       |       |         |
| Overall                              | 1 | 5/89           | 61.3 (7.6–115.0)                      | N/A   |         |
| CHB-no FL                            | 1 | 3/58           | 56.4 (0.0–120.3)                      | N/A   | 0.81    |
| CHB-FL                               | 1 | 2/31           | 70.4 (0.0–167.9)                      | N/A   |         |

CHB, chronic hepatitis B; FL, fatty liver; FLD, fatty liver disease; N/A, not available.
